# Supplementary material
Source: Atypon-hosted journal article supplement (doi:10.1287/ijoc.2025.1353)

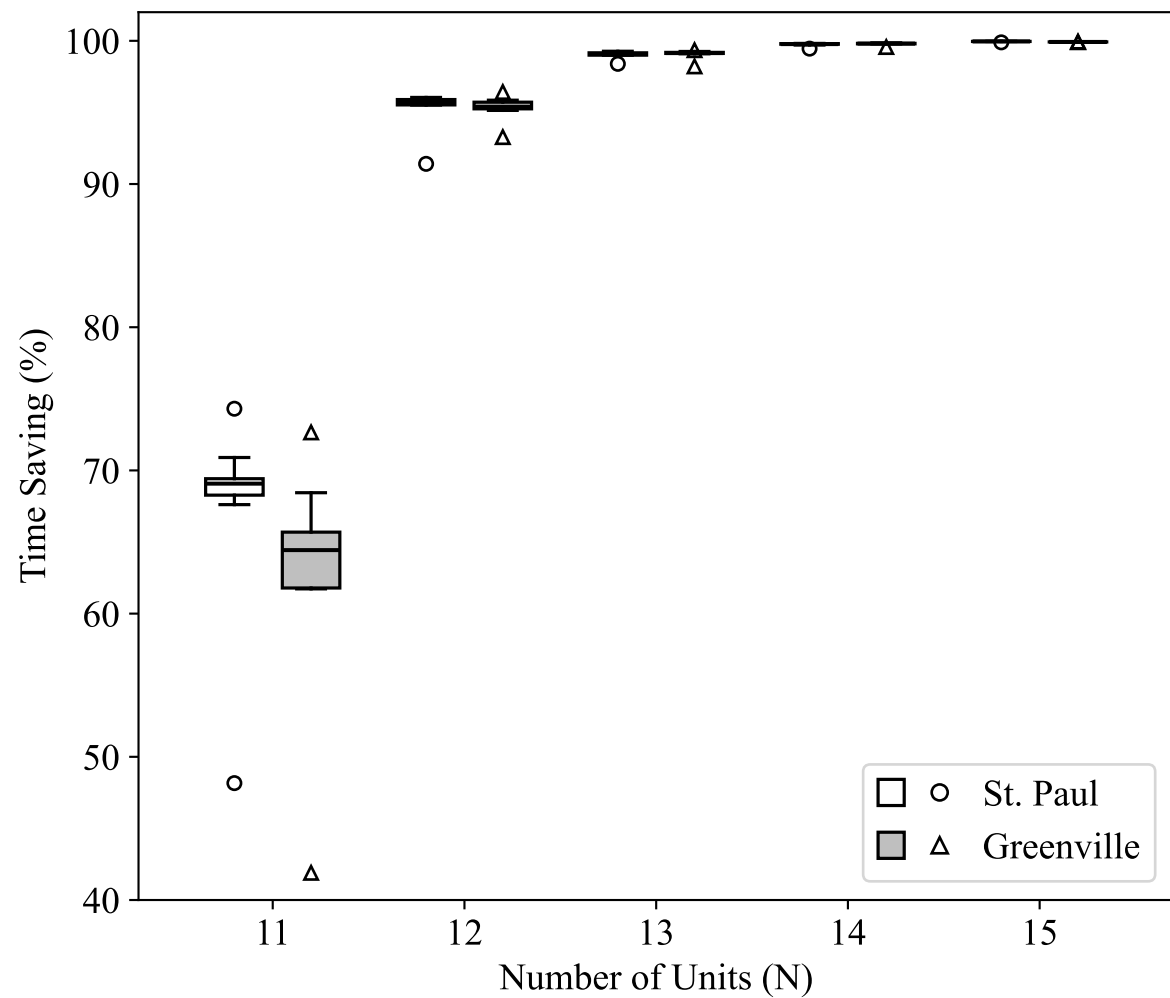

(a) Percentage Time Saving

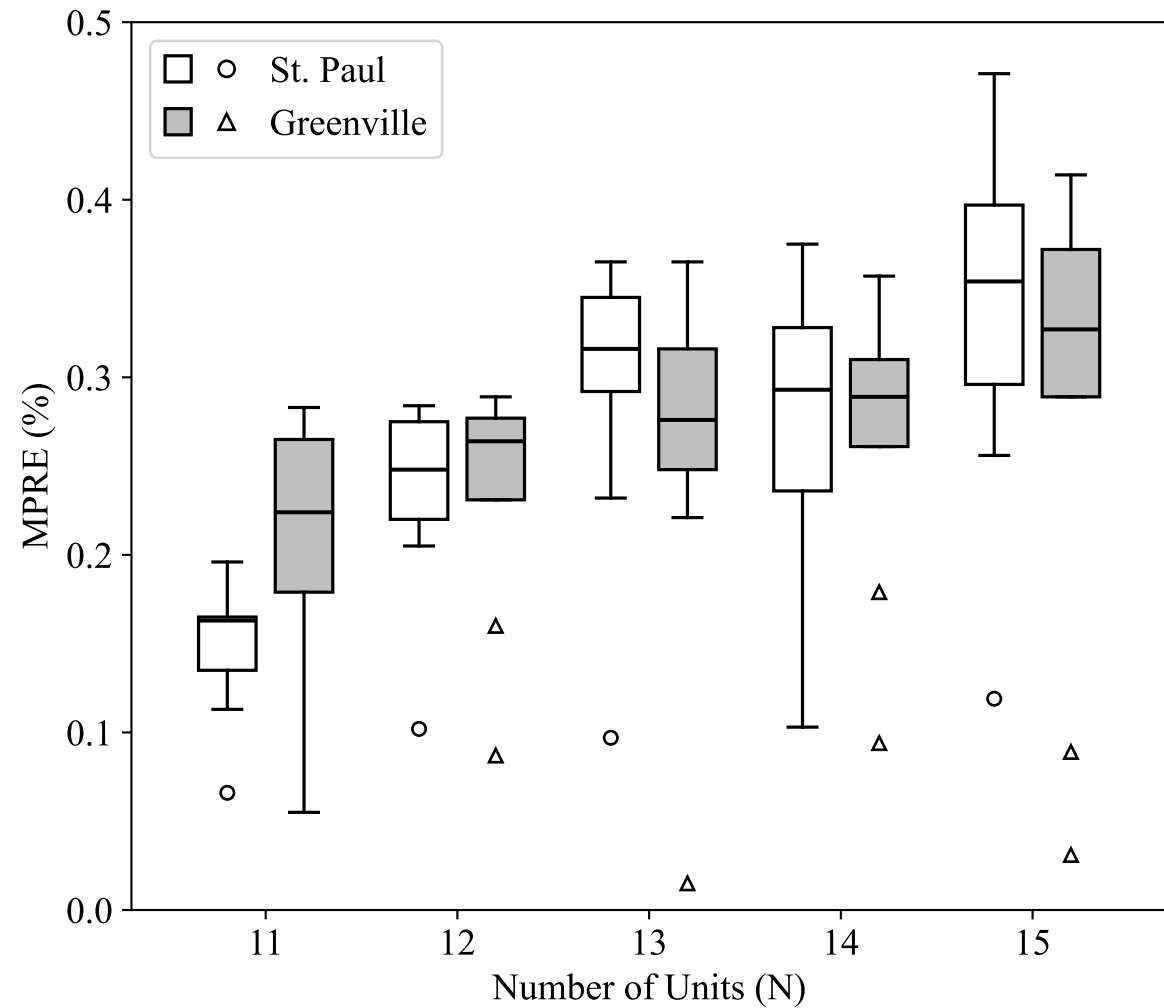

(b) MPRE for Steady State Probability Distribution

Supplement: ijoc.2025.1353.cd.zip [file TimeSaving&MPRE-gray.pdf › 2025.1353-main/results/TimeSaving&MPRE-gray.pdf]

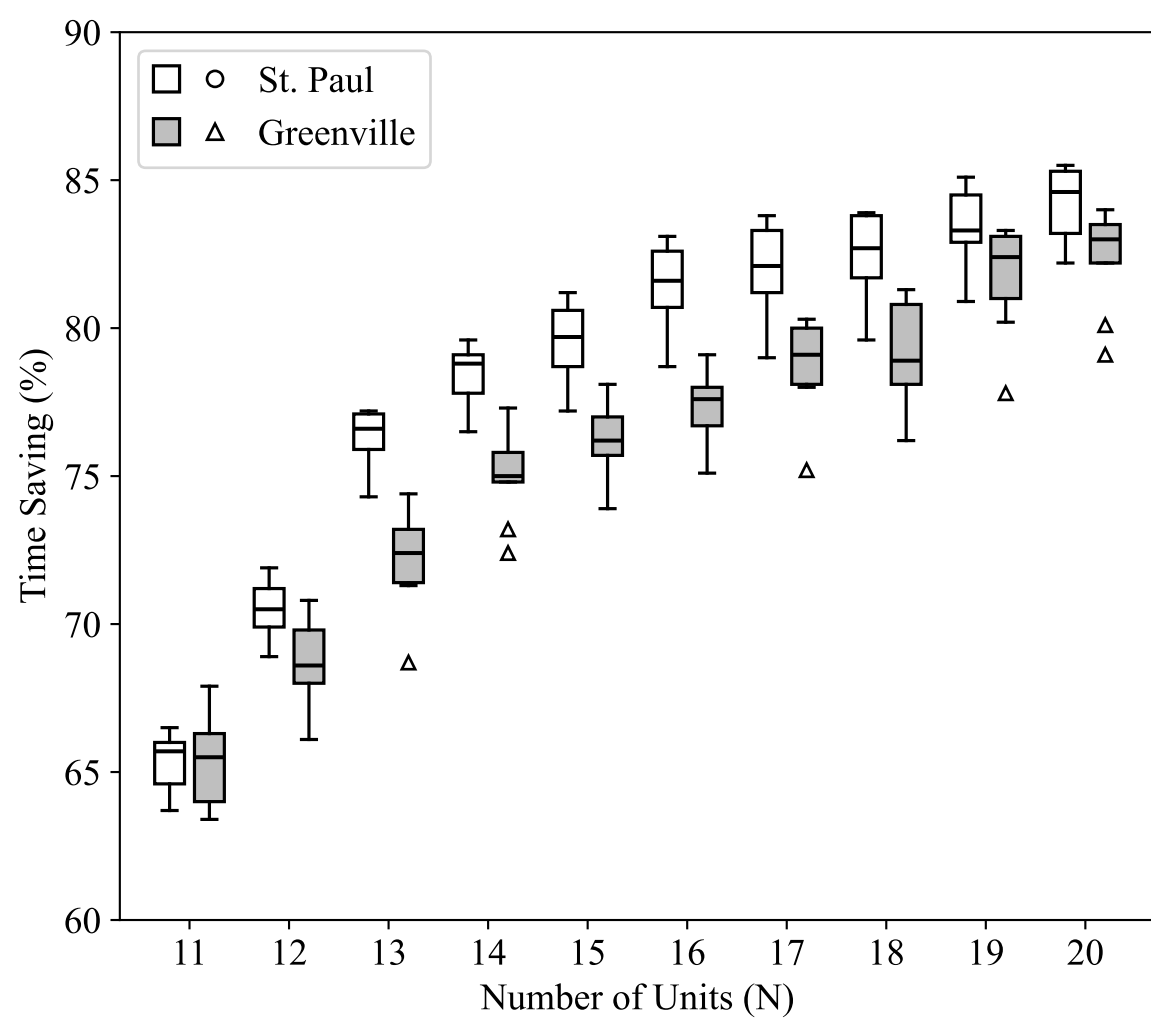

(a) Percentage Time Saving

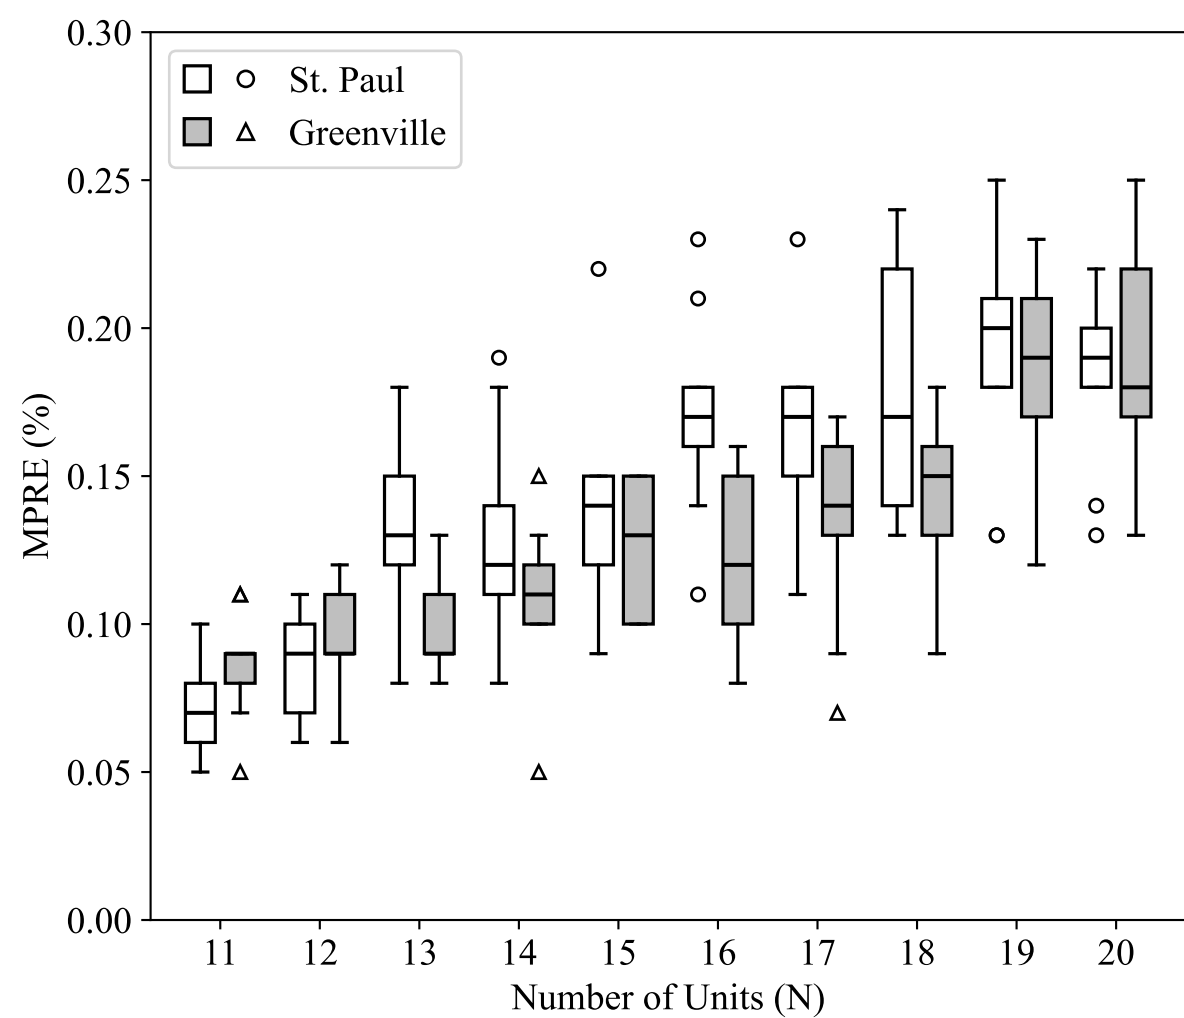

(b) MPRE for Steady State Probability Distribution

Supplement: ijoc.2025.1353.cd.zip [file TimeSaving&MPRE-homo-gray.pdf › 2025.1353-main/results/TimeSaving&MPRE-homo-gray.pdf]
